# Supplementary material
Source: PubMed Central journal article supplement (PMC4344887)

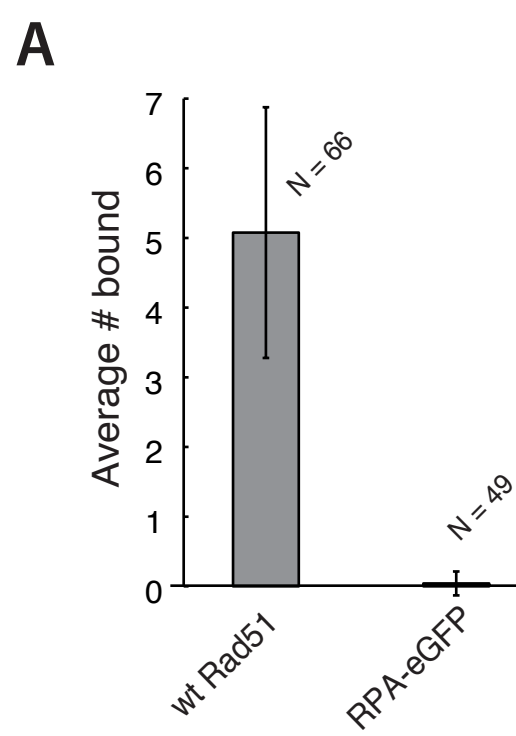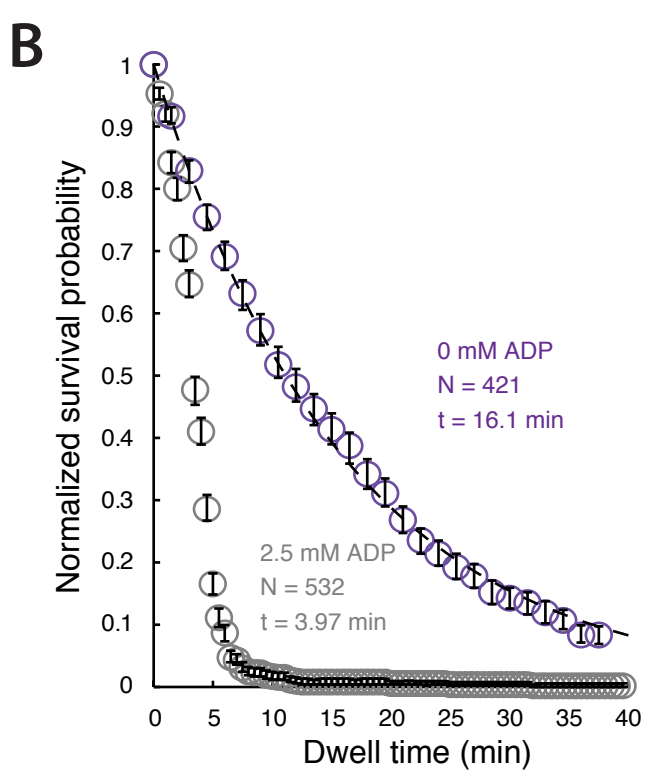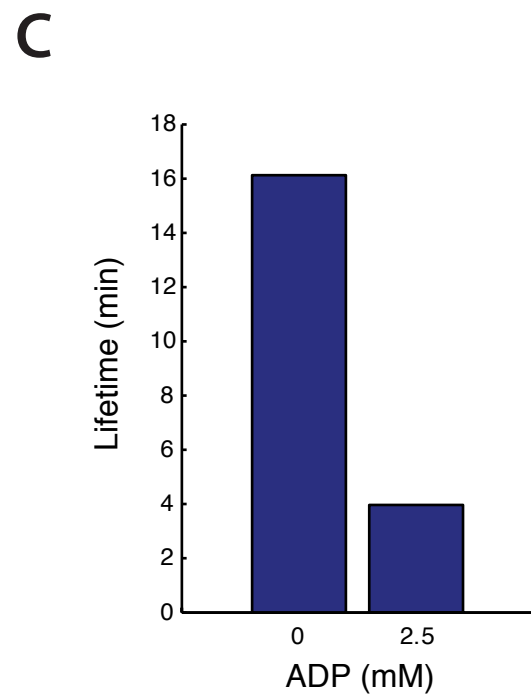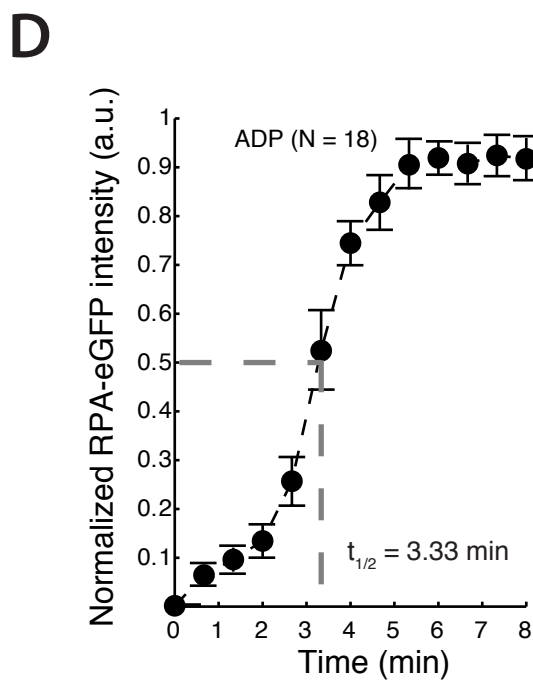

Supplement: NIHMS657012-supplement-4.pdf [file NIHMS657012-supplement-4.pdf]
